# Supplementary material for: Left Preference for Sport Tasks Does Not Necessarily Indicate Left-Handedness: Sport-Specific Lateral Preferences, Relationship with Handedness and Implications for Laterality Research in Behavioural Sciences
Source: PubMed Central journal article supplement (PMC4139391; doi:10.1371/journal.pone.0105800), 2014-08-20
Supplement: pone.0105800.s001.pdf [file pone.0105800.s001.pdf]

**Table S1. Pictures used to facilitate understanding of left and right for sport-specific tasks.**

| <b>Sport</b> | <b>Left</b>                                                                                                                                                                                                                                                                                                                     | <b>Right</b>                                                                                                                                                                                                                                                                                                                     |
|--------------|---------------------------------------------------------------------------------------------------------------------------------------------------------------------------------------------------------------------------------------------------------------------------------------------------------------------------------|----------------------------------------------------------------------------------------------------------------------------------------------------------------------------------------------------------------------------------------------------------------------------------------------------------------------------------|
| baseball     |  A black and white photograph of a person in a dark t-shirt and dark pants with a white stripe down the side, holding a baseball bat in a left-handed batting stance. The person is facing right, with the bat held over their right shoulder. |  A black and white photograph of a person in a dark t-shirt and dark pants with a white stripe down the side, holding a baseball bat in a right-handed batting stance. The person is facing right, with the bat held over their left shoulder. |
| boxing       |  A black and white photograph of a person in a dark t-shirt and dark pants with a white stripe down the side, wearing boxing gloves. They are in a left-handed boxing stance, facing right with their left hand forward.                      |  A black and white photograph of a person in a dark t-shirt and dark pants with a white stripe down the side, wearing boxing gloves. They are in a right-handed boxing stance, facing right with their right hand forward.                    |
| fencing      |  A black and white photograph of a person in a white fencing uniform, seen from behind. They are in a left-handed fencing stance, facing right with their left hand forward.                                                                 |  A black and white photograph of a person in a white fencing uniform, seen from behind. They are in a right-handed fencing stance, facing right with their right hand forward.                                                               |
| ice hockey   |  A black and white photograph of a person in a dark t-shirt and dark pants with a white stripe down the side, holding an ice hockey stick. They are in a left-handed stance, leaning forward with the stick on the floor.                    |  A black and white photograph of a person in a dark t-shirt and dark pants with a white stripe down the side, holding an ice hockey stick. They are in a right-handed stance, leaning forward with the stick on the floor.                   |

Table S1. (continued)

| Sport                                                      | Left                                                                                | Right                                                                                |
|------------------------------------------------------------|-------------------------------------------------------------------------------------|--------------------------------------------------------------------------------------|
| racket sports<br>(e.g. table tennis,<br>tennis, badminton) |    |    |
| soccer                                                     |   |   |
| ninepin, tenpin<br>bowling                                 |  |  |
| billiards                                                  |  |  |
| golf                                                       |  |  |

Table S1. (continued)

| Sport                          | Left                                                                                | Right                                                                                 |
|--------------------------------|-------------------------------------------------------------------------------------|---------------------------------------------------------------------------------------|
| target shooting                |    |    |
| archery                        |   |   |
| skateboarding,<br>snowboarding |  |  |
| long jump                      |  |  |

**Table S1. (continued)**

| Sport                                                                                                                                                               | Left                                                                                | Right                                                                                 |
|---------------------------------------------------------------------------------------------------------------------------------------------------------------------|-------------------------------------------------------------------------------------|---------------------------------------------------------------------------------------|
| <p>high jump</p> <p>(Note: Approaching from the left means jumping off with the right foot and vice versa. Participants were informed about this relationship.)</p> |    |     |
| <p>e.g. figure skating (rotation)</p>                                                                                                                               |   |   |
| <p>e.g. dart, team-handball (throwing)</p>                                                                                                                          |  |  |
