# Supplementary material for: Left Preference for Sport Tasks Does Not Necessarily Indicate Left-Handedness: Sport-Specific Lateral Preferences, Relationship with Handedness and Implications for Laterality Research in Behavioural Sciences
Source: PubMed Central journal article supplement (PMC4139391; doi:10.1371/journal.pone.0105800), 2014-08-20
Supplement: pone.0105800.s002.pdf [file pone.0105800.s002.pdf]

**Table S2. Lateral preferences for sport-specific tasks (raw frequencies).**

| Type of preference   | Task (Sport)                                        | Overall |     |       |      |    |       | Male |    |       | Female |    |       |
|----------------------|-----------------------------------------------------|---------|-----|-------|------|----|-------|------|----|-------|--------|----|-------|
|                      |                                                     | Left    | NP  | Right | Left | NP | Right | Left | NP | Right | Left   | NP | Right |
| hand<br>(unilateral) | throwing (e.g., darts, team-handball)               | 71      | 14  | 817   | 36   | 5  | 366   | 35   | 9  | 451   |        |    |       |
|                      | holding a weapon (fencing)                          | 68      | 19  | 815   | 37   | 7  | 363   | 31   | 12 | 452   |        |    |       |
|                      | holding a racket (racket sports)                    | 69      | 12  | 821   | 35   | 5  | 367   | 34   | 7  | 454   |        |    |       |
|                      | bowling (ninepin, tenpin bowling)                   | 64      | 13  | 824   | 31   | 3  | 373   | 33   | 10 | 451   |        |    |       |
| hand<br>(bilateral)  | holding a cue (billiards)                           | 90      | 33  | 777   | 44   | 8  | 354   | 46   | 25 | 423   |        |    |       |
|                      | batting (baseball)                                  | 123     | 51  | 724   | 59   | 18 | 331   | 64   | 33 | 393   |        |    |       |
|                      | holding a stick (ice hockey)                        | 221     | 82  | 591   | 97   | 40 | 268   | 124  | 42 | 323   |        |    |       |
|                      | stance (boxing)                                     | 257     | 77  | 562   | 86   | 35 | 284   | 171  | 42 | 278   |        |    |       |
|                      | shooting orientation (golf)                         | 187     | 65  | 645   | 78   | 27 | 303   | 109  | 38 | 342   |        |    |       |
|                      | shooting orientation (target shooting)              | 94      | 67  | 730   | 40   | 19 | 343   | 54   | 48 | 387   |        |    |       |
| foot                 | shooting orientation (archery)                      | 89      | 36  | 772   | 39   | 8  | 359   | 50   | 28 | 413   |        |    |       |
|                      | kicking a ball (soccer)                             | 90      | 67  | 744   | 49   | 28 | 329   | 41   | 39 | 415   |        |    |       |
|                      | jump off (long jump)                                | 289     | 84  | 525   | 149  | 27 | 230   | 140  | 57 | 295   |        |    |       |
|                      | jump off (high jump)                                | 556     | 88  | 252   | 270  | 34 | 101   | 286  | 54 | 151   |        |    |       |
| rotation             | front foot (skateboarding, snowboarding)            | 362     | 127 | 411   | 183  | 60 | 164   | 179  | 67 | 247   |        |    |       |
|                      | rotation along vertical axis (e.g., figure skating) | 378     | 144 | 375   | 182  | 76 | 147   | 196  | 68 | 228   |        |    |       |

*Note:* ‘NP’ = no lateral preference
