# Supplementary material for: Left Preference for Sport Tasks Does Not Necessarily Indicate Left-Handedness: Sport-Specific Lateral Preferences, Relationship with Handedness and Implications for Laterality Research in Behavioural Sciences
Source: PubMed Central journal article supplement (PMC4139391; doi:10.1371/journal.pone.0105800), 2014-08-20
Supplement: pone.0105800.s003.pdf [file pone.0105800.s003.pdf]

**Table S3. Relationship between sport-specific lateral preferences and handedness.**

| Type of preference | Task                     | Inclusion of 'no preference' |                    |                    | Exclusion of 'no preference' |                     |                    |
|--------------------|--------------------------|------------------------------|--------------------|--------------------|------------------------------|---------------------|--------------------|
|                    |                          | Overall                      | Male               | Female             | Overall                      | Male                | Female             |
| hand (unilateral)  | throwing                 | .836                         | .816               | .857               | .841                         | .815                | .868               |
|                    | fencing                  | .855                         | .890               | .824               | .878                         | .900                | .853               |
|                    | holding a racket         | .869                         | .861               | .878               | .882                         | .870                | .895               |
|                    | bowling                  | .765                         | .735               | .795               | .769                         | .735                | .805               |
| hand (bilateral)   | holding a cue            | .732                         | .811               | .657               | .750                         | .827                | .675               |
|                    | baseball batting         | .445                         | .398               | .491               | .457                         | .408                | .504               |
|                    | holding a stick          | .251                         | .184 <sup>a</sup>  | .314               | .250                         | .181                | .313               |
|                    | boxing stance            | .304                         | .426               | .232               | .310                         | .427                | .241               |
|                    | golfing                  | .292                         | .252               | .332               | .295                         | .258                | .332               |
|                    | target shooting          | .576                         | .646               | .523               | .595                         | .669                | .536               |
|                    | archery                  | .682                         | .724               | .648               | .690                         | .733                | .657               |
| foot               | kicking                  | .536                         | .428               | .656               | .557                         | .431                | .699               |
|                    | long jump                | .187                         | .068 <sup>ns</sup> | .299               | .181                         | .065 <sup>ns</sup>  | .292               |
|                    | high jump                | .168                         | .186               | .166 <sup>a</sup>  | -.178                        | -.193               | -.175              |
|                    | skateboarding            | .103 <sup>a</sup>            | .099 <sup>ns</sup> | .107 <sup>ns</sup> | .096 <sup>a</sup>            | .073 <sup>ns</sup>  | .109 <sup>b</sup>  |
| rotation           | rotating (vertical axis) | .021 <sup>ns</sup>           | .066 <sup>ns</sup> | .088 <sup>ns</sup> | .022 <sup>ns</sup>           | -.038 <sup>ns</sup> | .067 <sup>ns</sup> |

*Note:* Here we categorized participants as left-handers ( $LS < 0$ ) or right-handers ( $LS \geq 0$ ) and we used these classifications to determine the relationship between sport-specific lateral preferences and handedness (represented by phi coefficients,  $\Phi$ ). We calculated  $\Phi$  twice to demonstrate that inclusion or exclusion of 'no preference' responses results in only marginally different relationships. The majority of relationships were significant with  $p < .001$ . To facilitate reading the table, only non-significant relationships or significant relationships with  $p$ -values larger than .001 are indicated as follows: <sup>ns</sup>  $p > .05$ , <sup>a</sup>  $p < .01$ , <sup>b</sup>  $p < .05$ .

Also, please note that the above relationships for exclusion of 'no preference' are only marginally different to the point-biserial correlation coefficients representing the relationship between sport-specific lateral preferences and the raw LS values obtained from the EHI (see Table 2 in the main text).
